# Supplementary material for: Engaging family supporters of adult patients with diabetes to improve clinical and patient-centered outcomes: study protocol for a randomized controlled trial
Source: Trials. 2018 Jul 24;19:394. doi: 10.1186/s13063-018-2785-2 (PMC6057090; doi:10.1186/s13063-018-2785-2)
Supplement: Supplementary file 5 — Visit planning worksheet. (PDF 209 kb) [file 13063_2018_2785_MOESM5_ESM.pdf]

## Visit Planning Worksheet for Primary Care Appointments

### Next Appointment

Date:

Time:

Provider name:

Labs/tests pre-ordered by primary care provider:

### Health Events since the last primary care appointment\*

|  |
|--|
|  |
|--|

\*Examples: visits to non-VA doctors or hospitals, illnesses, changes patient to health regimen  
If you completed the [Patient Event Log \[hyperlinked\]](#), bring it with you to the appointment.

### My questions for my primary care team:

| Some Common Topics                |  |
|-----------------------------------|--|
| ▪ Symptoms                        |  |
| ▪ Using medicines                 |  |
| ▪ Medication side effects         |  |
| ▪ High sugars                     |  |
| ▪ Low sugars                      |  |
| ▪ Controlling blood pressure      |  |
| ▪ Quitting smoking                |  |
| ▪ Healthy eating                  |  |
| ▪ Physical activity               |  |
| ▪ What might happen in the future |  |
| ▪ Getting things done at the VA   |  |
| ▪ Referrals or consults           |  |

### Information I will bring from home:

- |                                                 |                                                                      |
|-------------------------------------------------|----------------------------------------------------------------------|
| <input type="checkbox"/> Blood sugar log        | <input type="checkbox"/> Notes or results from non-VA medical visits |
| <input type="checkbox"/> Blood pressure log     | <input type="checkbox"/> Other:                                      |
| <input type="checkbox"/> Medication list or log |                                                                      |

**Role I would like my Care Partner to play in my visit** (if Care Partner is coming to appointment with me):
